# Supplementary material
Source: PubMed Central journal article supplement (PMC7064382)
Supplement: NIHMS1066649-supplement-Supplemental_Tables.pdf [file NIHMS1066649-supplement-Supplemental_Tables.pdf]

**Table S1. Effect of dose reduction scenarios on patients with predicted neuropathy score  $\geq 8$  at C7D1, stratified by C4D1 neuropathy scores (paclitaxel).**

| Scenario                             | % Dose reduction in each cycle compared to Cycle 3 dose (total % dose reduction) | Paclitaxel                                                 |                                        |                                        |                                              |
|--------------------------------------|----------------------------------------------------------------------------------|------------------------------------------------------------|----------------------------------------|----------------------------------------|----------------------------------------------|
|                                      |                                                                                  | Percent of patients with neuropathy Score $\geq 8$ at C7D1 |                                        |                                        |                                              |
|                                      |                                                                                  | C4D1 neuropathy Score < 4 (Category 1)                     | C4D1 neuropathy Score 4-7 (Category 2) | C4D1 neuropathy Score 8-9 (Category 3) | C4D1 neuropathy Score $\geq 10$ (Category 4) |
| No dose reduction                    | 0%                                                                               | 0                                                          | 100 (23/23)                            | 100 (14/14)                            | 100 (14/14)                                  |
| Scenario 1: Reduction                | 10%                                                                              | 0                                                          | 87 (20/23)                             | 100 (14/14)                            | 100 (14/14)                                  |
|                                      | 20%                                                                              | 0                                                          | 57 (13/23)                             | 79 (11/14)                             | 100 (14/14)                                  |
|                                      | 30%                                                                              | 0                                                          | 13 (3/23)                              | 57 (8/14)                              | 100 (14/14)                                  |
|                                      | 40%                                                                              | 0                                                          | 4 (1/23)                               | 50 (7/14)                              | 100 (14/14)                                  |
|                                      | 50%                                                                              | 0                                                          | 0                                      | 36 (5/14)                              | 86 (12/14)                                   |
| Scenario 2: Skip day 8 +/- reduction | Skip day 8 (33%)                                                                 | 0                                                          | 13 (3/23)                              | 50 (7/14)                              | 100 (14/14)                                  |
|                                      | Skip day 8 + 10% dose reduction (40%)                                            | 0                                                          | 4 (1/23)                               | 50 (7/14)                              | 100 (14/14)                                  |
|                                      | Skip day 8 + 20% dose reduction (47%)                                            | 0                                                          | 0                                      | 36 (5/14)                              | 86 (12/14)                                   |
|                                      | Skip day 8 + 30% dose reduction (53%)                                            | 0                                                          | 0                                      | 21 (3/14)                              | 71 (10/14)                                   |
|                                      | Skip day 8 + 40% dose reduction (60%)                                            | 0                                                          | 0                                      | 7 (1/14)                               | 57 (8/14)                                    |
|                                      | Skip day 8 + 50% dose reduction (67%)                                            | 0                                                          | 0                                      | 0                                      | 50 (7/14)                                    |
| Scenario 3: Skip C4 +/- reduction    | Skip C4 doses (33%#)                                                             | 0                                                          | 13 (3/23)                              | 71 (10/14)                             | 100 (14/14)                                  |
|                                      | Skip C4 doses + 10% dose reduction (40%)                                         | 0                                                          | 4 (1/23)                               | 64 (9/14)                              | 100 (14/14)                                  |
|                                      | Skip C4 doses + 20% dose reduction (47%)                                         | 0                                                          | 0                                      | 57 (8/14)                              | 100 (14/14)                                  |
|                                      | Skip C4 doses + 30% dose reduction (53%)                                         | 0                                                          | 0                                      | 29 (4/14)                              | 93 (13/14)                                   |
|                                      | Skip C4 doses + 40% dose reduction (60%)                                         | 0                                                          | 0                                      | 7 (1/14)                               | 79 (11/14)                                   |
|                                      | Skip C4 doses + 50% dose reduction (67%)                                         | 0                                                          | 0                                      | 0                                      | 43 (6/14)                                    |

The total number of patients with predicted neuropathy score  $\geq 8$  at C7D1 were 23/45 (51%), 14/14 (100%), 14/14 (100%) in categories 2, 3 and 4, respectively.

**Table S2. Effect of dose reduction scenarios on patients with predicted neuropathy score  $\geq 8$  at C7D1, stratified by C4D1 neuropathy scores (nab-paclitaxel)**

| Scenario                             | % Dose reduction in each cycle compared to Cycle 3 dose (total % dose reduction) | Nab-paclitaxel                                             |                                        |                                        |                                              |
|--------------------------------------|----------------------------------------------------------------------------------|------------------------------------------------------------|----------------------------------------|----------------------------------------|----------------------------------------------|
|                                      |                                                                                  | Percent of patients with neuropathy Score $\geq 8$ at C7D1 |                                        |                                        |                                              |
|                                      |                                                                                  | C4D1 neuropathy Score < 4 (Category 1)                     | C4D1 neuropathy Score 4-7 (Category 2) | C4D1 neuropathy Score 8-9 (Category 3) | C4D1 neuropathy Score $\geq 10$ (Category 4) |
| No dose reduction                    | 0%                                                                               | 100 (2/2)                                                  | 100 (26/26)                            | 100 (13/13)                            | 100 (17/17)                                  |
| Scenario 1: Reduction                | 10%                                                                              | 0                                                          | 77 (20/26)                             | 100 (13/13)                            | 100 (17/17)                                  |
|                                      | 20%                                                                              | 0                                                          | 58 (15/26)                             | 92 (12/13)                             | 100 (17/17)                                  |
|                                      | 30%                                                                              | 0                                                          | 35 (9/26)                              | 77 (10/13)                             | 88 (15/17)                                   |
|                                      | 40%                                                                              | 0                                                          | 27 (7/26)                              | 77 (10/13)                             | 76 (13/17)                                   |
|                                      | 50%                                                                              | 0                                                          | 19 (5/26)                              | 69 (9/13)                              | 76 (13/17)                                   |
| Scenario 2: Skip day 8 +/- reduction | Skip day 8 (33%)                                                                 | 0                                                          | 35 (9/26)                              | 77 (10/13)                             | 88 (15/17)                                   |
|                                      | Skip day 8 + 10% dose reduction (40%)                                            | 0                                                          | 27 (7/26)                              | 77 (10/13)                             | 76 (13/17)                                   |
|                                      | Skip day 8 + 20% dose reduction (47%)                                            | 0                                                          | 23 (6/26)                              | 77 (10/13)                             | 76 (13/17)                                   |
|                                      | Skip day 8 + 30% dose reduction (53%)                                            | 0                                                          | 15 (4/26)                              | 62 (8/13)                              | 76 (13/17)                                   |
|                                      | Skip day 8 + 40% dose reduction (60%)                                            | 0                                                          | 12 (3/26)                              | 46 (6/13)                              | 76 (13/17)                                   |
|                                      | Skip day 8 + 50% dose reduction (67%)                                            | 0                                                          | 8 (2/26)                               | 31 (4/13)                              | 65 (11/17)                                   |
| Scenario 3: Skip C4 +/- reduction    | Skip C4 doses (33%#)                                                             | 0                                                          | 35 (9/26)                              | 92 (12/13)                             | 100 (17/17)                                  |
|                                      | Skip C4 doses + 10% dose reduction (40%)                                         | 0                                                          | 27 (7/26)                              | 85 (11/13)                             | 100 (17/17)                                  |
|                                      | Skip C4 doses + 20% dose reduction (47%)                                         | 0                                                          | 19 (5/26)                              | 69 (9/13)                              | 94 (16/17)                                   |
|                                      | Skip C4 doses + 30% dose reduction (53%)                                         | 0                                                          | 15 (4/26)                              | 62 (8/13)                              | 76 (13/17)                                   |
|                                      | Skip C4 doses + 40% dose reduction (60%)                                         | 0                                                          | 12 (3/26)                              | 54 (7/13)                              | 76 (13/17)                                   |
|                                      | Skip C4 doses + 50% dose reduction (67%)                                         | 0                                                          | 8 (2/26)                               | 31 (4/13)                              | 76 (13/17)                                   |

The total number of patients with predicted neuropathy score  $\geq 8$  at C7D1 were 2/68 (3%), 26/48 (54%), 13/13 (100%), 17/17 (100%) in categories 1, 2, 3 and 4, respectively.

**Table S3. Effect of dose reduction scenarios on patients with predicted neuropathy score  $\geq 8$  at C7D1, stratified by C4D1 neuropathy scores (ixabepilone).**

| Scenario                             | % Dose reduction in each cycle compared to Cycle 3 dose (total % dose reduction) | Ixabepilone                                                |                                        |                                        |                                              |
|--------------------------------------|----------------------------------------------------------------------------------|------------------------------------------------------------|----------------------------------------|----------------------------------------|----------------------------------------------|
|                                      |                                                                                  | Percent of patients with neuropathy Score $\geq 8$ at C7D1 |                                        |                                        |                                              |
|                                      |                                                                                  | C4D1 neuropathy Score <4 (Category 1)                      | C4D1 neuropathy Score 4-7 (Category 2) | C4D1 neuropathy Score 8-9 (Category 3) | C4D1 neuropathy Score $\geq 10$ (Category 4) |
| No dose reduction                    | 0%                                                                               | 100 (3/3)                                                  | 100 (24/24)                            | 100 (6/6)                              | 100 (10/10)                                  |
| Scenario 1: Reduction                | 10%                                                                              | 100 (3/3)                                                  | 100 (24/24)                            | 100 (6/6)                              | 100 (10/10)                                  |
|                                      | 20%                                                                              | 100 (3/3)                                                  | 88 (21/24)                             | 100 (6/6)                              | 100 (10/10)                                  |
|                                      | 30%                                                                              | 33 (1/3)                                                   | 75 (18/24)                             | 100 (6/6)                              | 100 (10/10)                                  |
|                                      | 40%                                                                              | 0                                                          | 63 (15/24)                             | 100 (6/6)                              | 90 (9/10)                                    |
|                                      | 50%                                                                              | 0                                                          | 54 (13/24)                             | 83 (5/6)                               | 90 (9/10)                                    |
| Scenario 2: Skip day 8 +/- reduction | Skip day 8 (33%)                                                                 | 0                                                          | 71 (17/24)                             | 100 (6/6)                              | 100 (10/10)                                  |
|                                      | Skip day 8 + 10% dose reduction (40%)                                            | 0                                                          | 63 (15/24)                             | 100 (6/6)                              | 90 (9/10)                                    |
|                                      | Skip day 8 + 20% dose reduction (47%)                                            | 0                                                          | 54 (13/24)                             | 100 (6/6)                              | 90 (9/10)                                    |
|                                      | Skip day 8 + 30% dose reduction (53%)                                            | 0                                                          | 54 (13/24)                             | 83 (5/6)                               | 90 (9/10)                                    |
|                                      | Skip day 8 + 40% dose reduction (60%)                                            | 0                                                          | 42 (10/24)                             | 83 (5/6)                               | 90 (9/10)                                    |
|                                      | Skip day 8 + 50% dose reduction (67%)                                            | 0                                                          | 38 (9/24)                              | 83 (5/6)                               | 80 (8/10)                                    |
| Scenario 3: Skip C4 +/- reduction    | Skip C4 doses (33%#)                                                             | 0                                                          | 67 (16/24)                             | 100 (6/6)                              | 100 (10/10)                                  |
|                                      | Skip C4 doses + 10% dose reduction (40%)                                         | 0                                                          | 54 (13/24)                             | 100 (6/6)                              | 100 (10/10)                                  |
|                                      | Skip C4 doses + 20% dose reduction (47%)                                         | 0                                                          | 54 (13/24)                             | 100 (6/6)                              | 100 (10/10)                                  |
|                                      | Skip C4 doses + 30% dose reduction (53%)                                         | 0                                                          | 46 (11/24)                             | 83 (5/6)                               | 90 (9/10)                                    |
|                                      | Skip C4 doses + 40% dose reduction (60%)                                         | 0                                                          | 42 (10/24)                             | 83 (5/6)                               | 90 (9/10)                                    |
|                                      | Skip C4 doses + 50% dose reduction (67%)                                         | 0                                                          | 29 (7/24)                              | 83 (5/6)                               | 90 (9/10)                                    |

The total number of patients with predicted neuropathy score  $\geq 8$  at C7D1 were 3/90 (3%), 24/26 (92%), 6/6 (100%), 10/10 (100%) in categories 1, 2, 3 and 4, respectively.
